# Supplementary material for: Biological Evaluation of Avocado Residues as a Potential Source of Bioactive Compounds
Source: MDPI journal article supplement (doi:10.3390/antiox11061049), 2022-05-25
Supplement: s1 [file s1]

## SUPPLEMENTARY MATERIALS

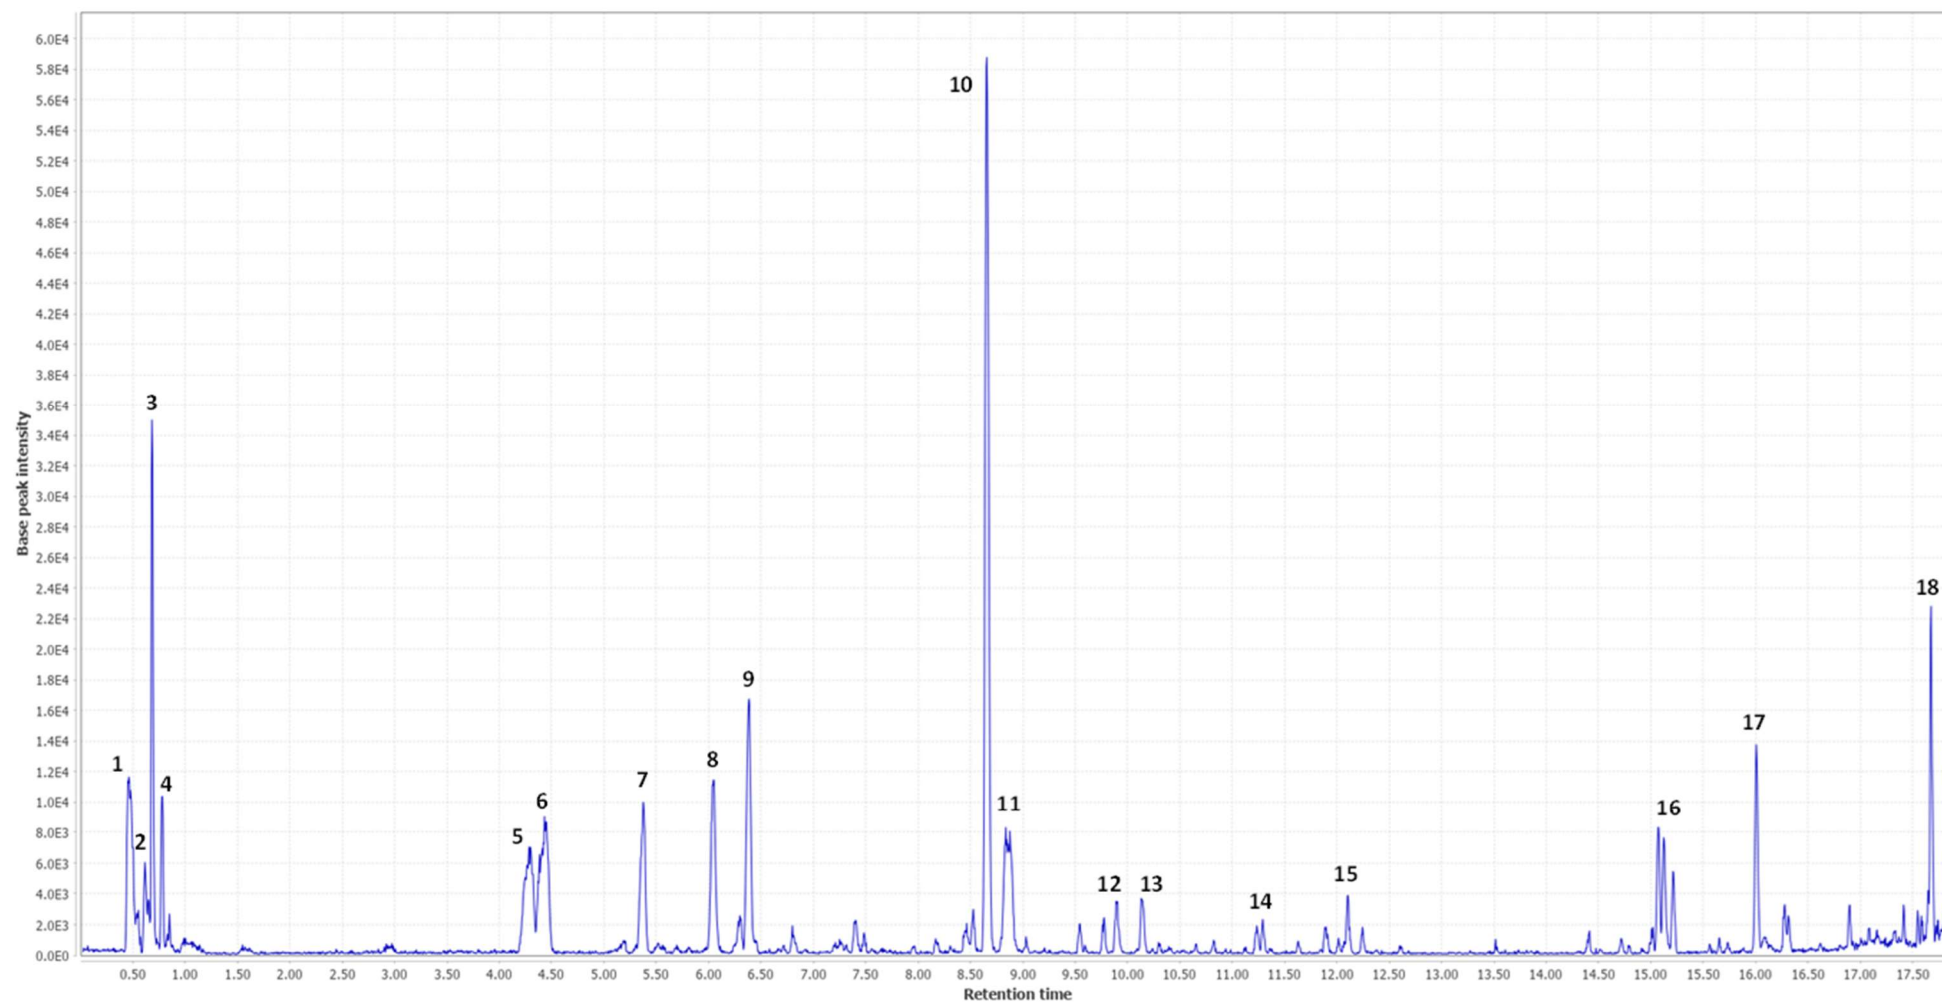

Figure S1. (a) Best peak chromatogram of avocado seed performed by HPLC-ESI-qTOF-MS. The main peaks are numbered as they appear on the table.

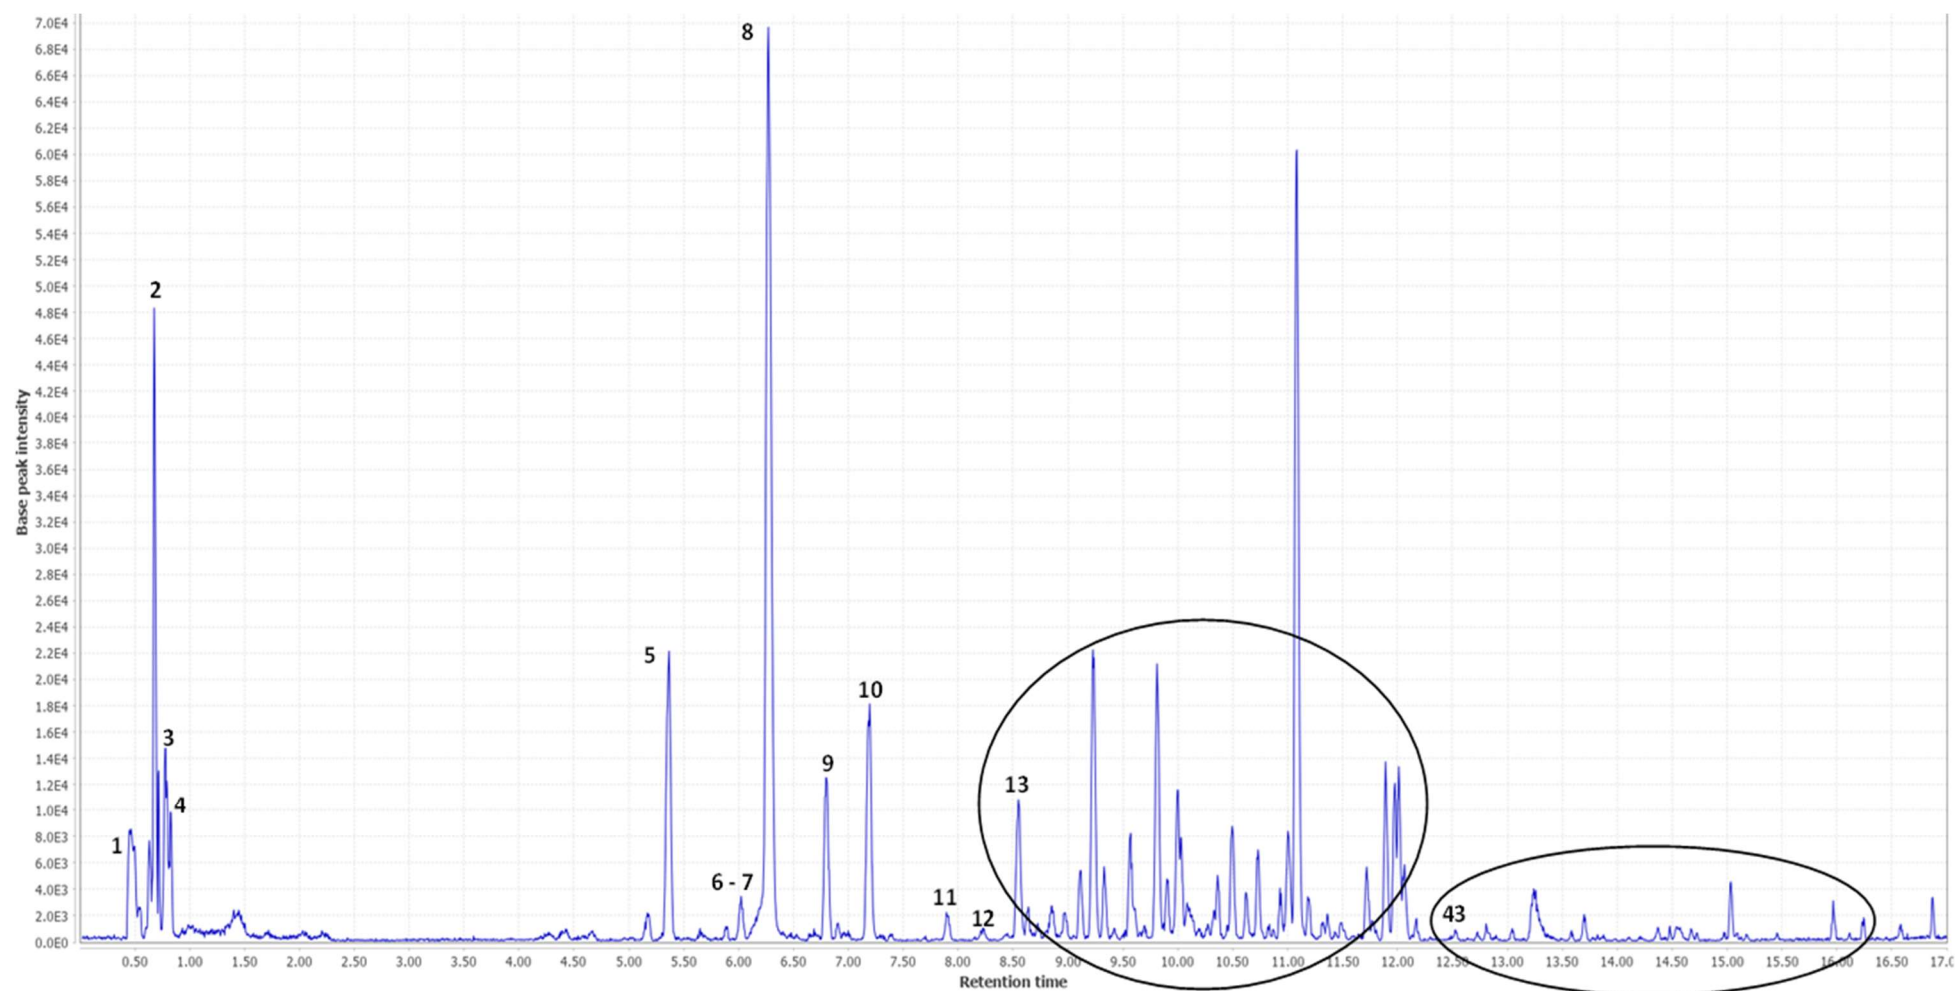

Figure S1. (b) Best peak chromatogram of avocado peel performed by HPLC-ESI-qTOF-MS. The main peaks are numbered as they appear on the table.

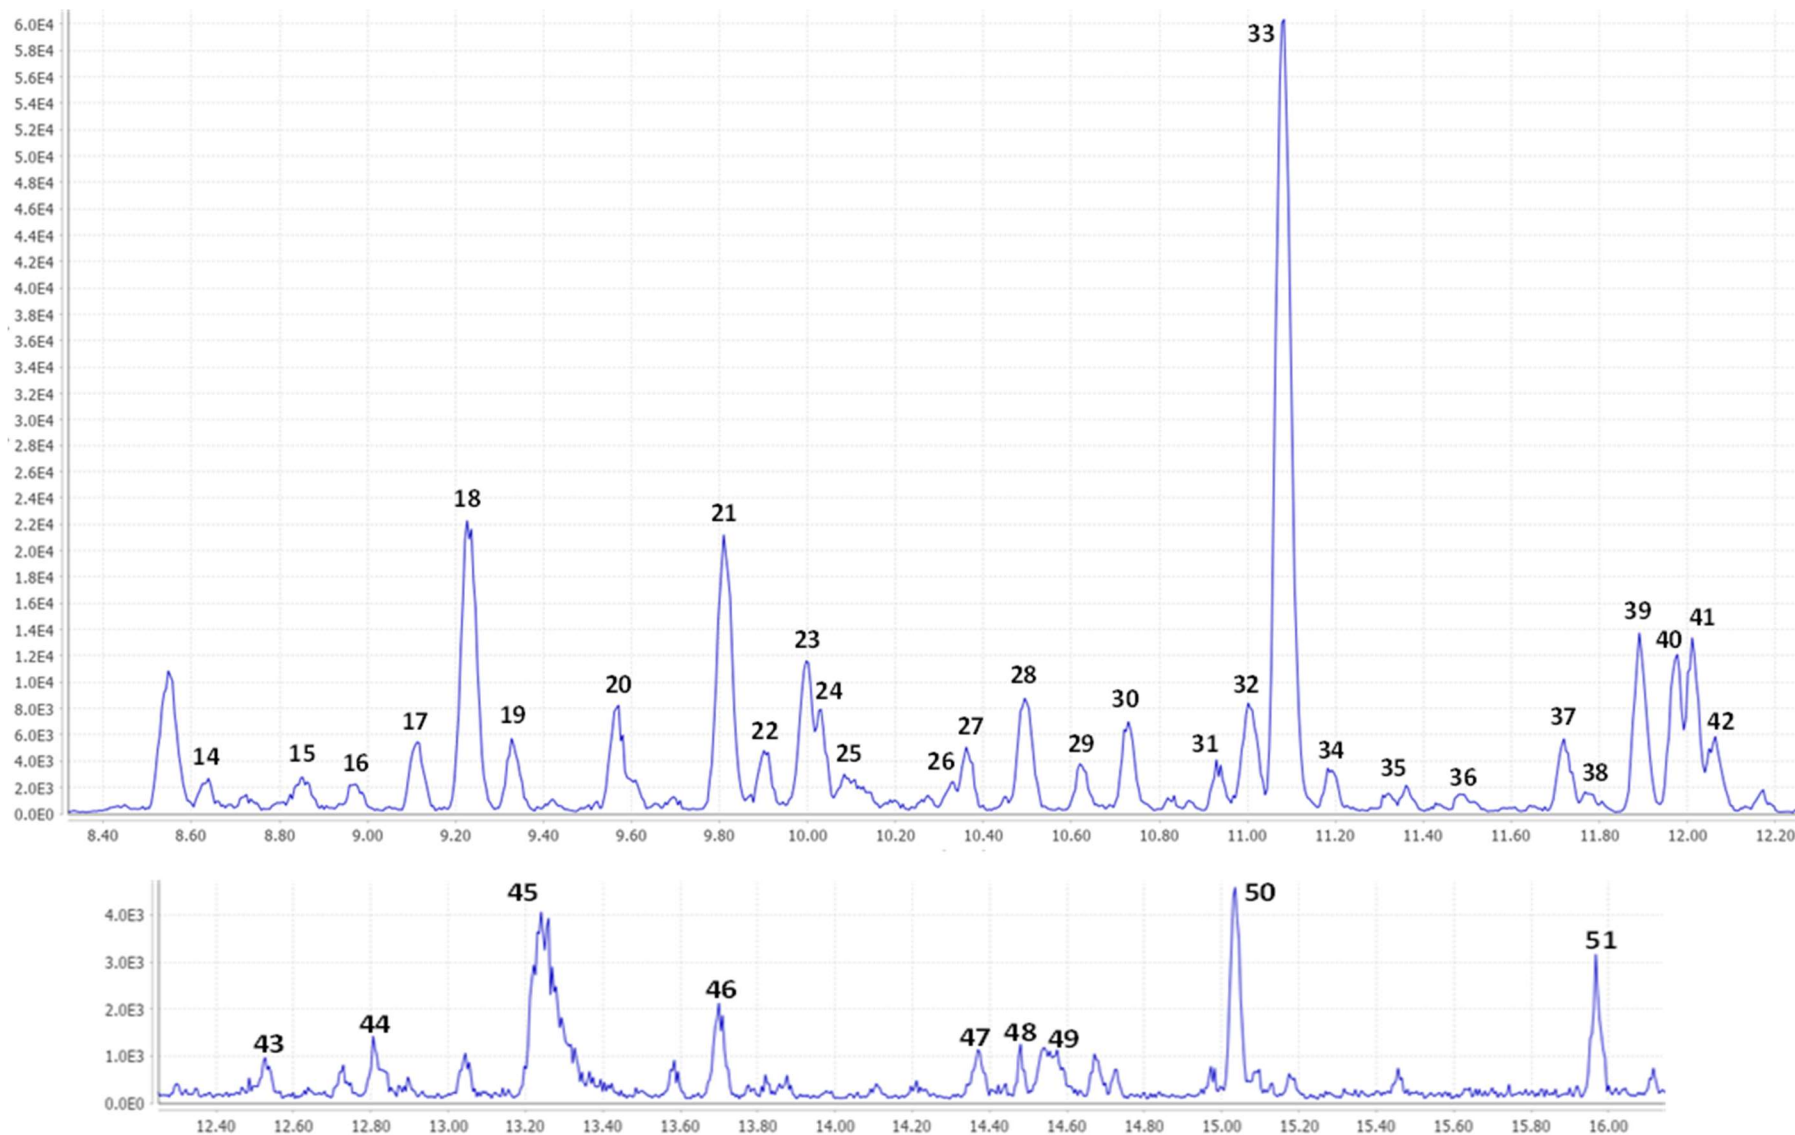

Figure S1. (c) Enlarged areas of the avocado peel chromatogram.
